# Supplementary material for: Air-stable double halide perovskite Cs2CuBiBr6: synthesis and memristor application
Source: Royal Society of Chemistry journal article supplement (doi:10.1039/d4cp04639k), 2025-01-01
Supplement: d4cp04639k1.pdf [file d4cp04639k1.pdf]

## Supporting Information

# Air-stable Double Halide Perovskite $\text{Cs}_2\text{CuBiBr}_6$ : Synthesis and Memristor Application

Atanu Betal<sup>†a</sup>, Anupam Chetia<sup>†a</sup>, Dibyajyoti Saikia<sup>a</sup>, Krishnendu Karmakar<sup>a</sup>, Ganesh Bera<sup>b,c</sup>, Neha V Dambhare<sup>d,e</sup>, Arup K. Rath<sup>d,e</sup>, and Satyajit Sahu<sup>a\*</sup>

<sup>a</sup>Indian Institute of Technology Jodhpur, Department of Physics, Jodhpur, India 342037

<sup>b</sup>UGC-DAE CSR, University Campus, Khandwa Road, Indore 452001, India

<sup>c</sup>Departamento de Física Aplicada-ICMUV, MALTA Consolider Team, Universitat de València, Valencia 46100, Spain

<sup>d</sup>Council of Scientific and Industrial Research, National Chemical Laboratory, Pune 411008, India;

<sup>e</sup>Academy of Scientific and Innovative Research, Ghaziabad, 201002, India

<sup>†</sup>Contributed Equally

\*Email: satyajit@iitj.ac.in

### Device Structure:

For the Resistive memory device application, the fabricated device consists of a layer of ITO, Double perovskite, and the metal electrode Aluminium. The schematic device structure is shown in Figure S1.

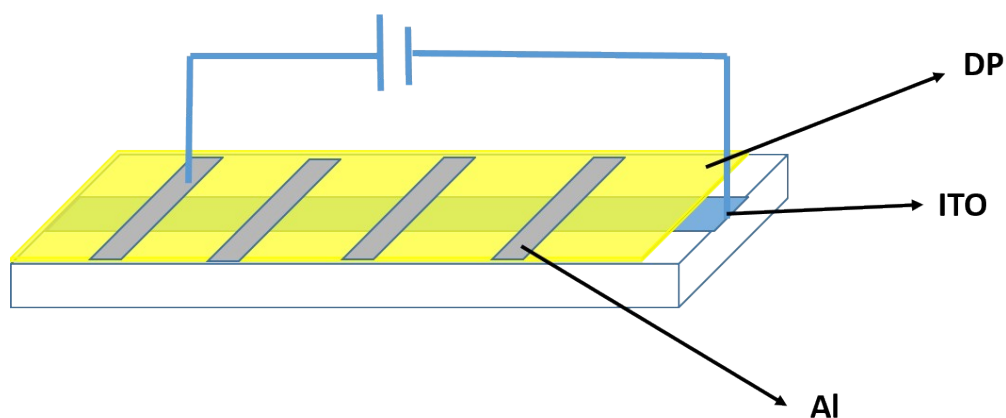

**Figure S1:** The schematic diagram of the fabricated device

## Characterizations:

The XPS characterization shows the full range spectrum of binding energy from 0 to 1200 eV in Figure S2(a), where all the peaks of the elements present in this double perovskite material are indicated. Figure S2(b)-(c) shows some FESEM images of the drop casted samples.

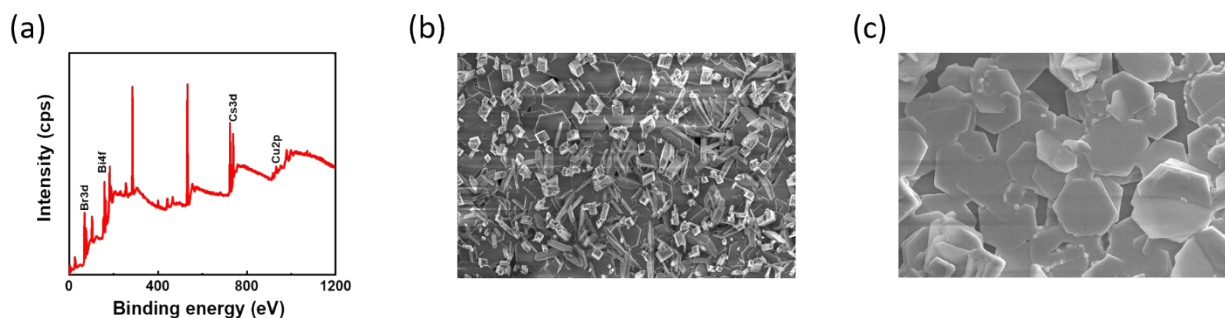

**Figure S2:** (a) The XPS spectra of the DP with a range from 0 to 1200 eV, (b)-(c). Some FESEM images of the material with scale 2 and 5 μm, respectively.

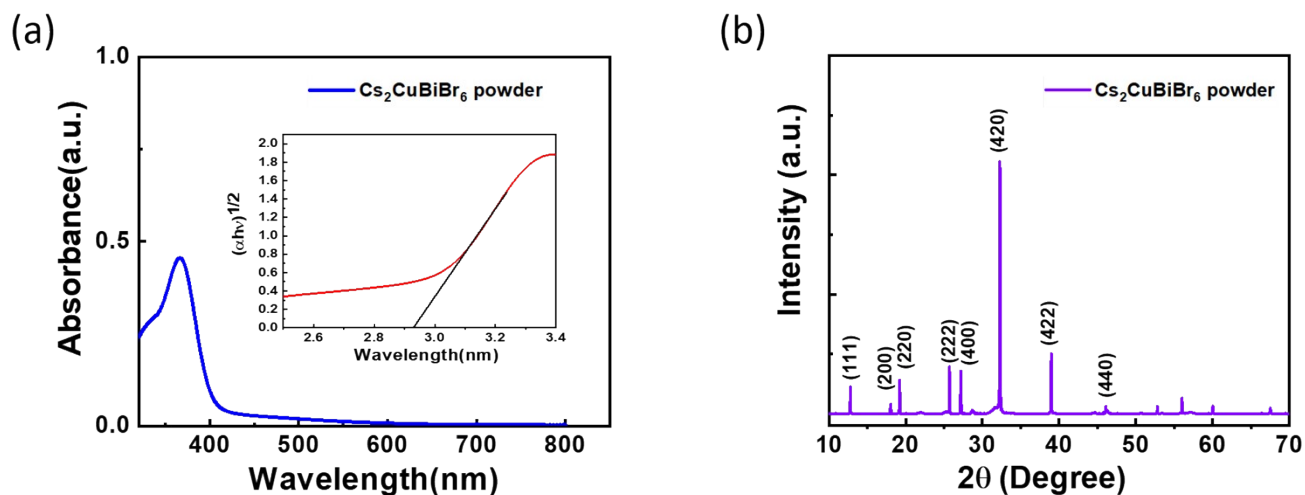

**Figure S3:** (a) The UV-Vis spectra and (b) XRD of the DP after one month in ambient condition.

**Table ST 1:** Comparison of different DP and their lattice constant, Ionic radii, bond lengths, and tolerance factors.

|  | Double perovskite material | Optimized lattice parameter (Å) | Ionic radii (Å) | Bond length (Å) | Tolerance factor |
|--|----------------------------|---------------------------------|-----------------|-----------------|------------------|
|  |                            |                                 |                 |                 |                  |

|    | $A_2BB'X_6$                                    | $a$          | $r_A$       | $r_B$       | $r_{B'}$    | $B-X$        | $B'-X$       | $t$          | $t'$         |
|----|------------------------------------------------|--------------|-------------|-------------|-------------|--------------|--------------|--------------|--------------|
| 1  | $Cs_2AgBiBr_6$                                 | 11.639       | 1.88        | 1.15        | 1.03        | 2.900        | 2.919        | 0.890        | 3.962        |
| 2  | $Cs_2AgBiCl_6$                                 | 10.964       | 1.88        | 1.15        | 1.03        | 2.746        | 2.736        | 0.900        | 3.825        |
| 3  | * $Cs_2AgBiI_6$                                | 12.415       | 1.88        | 1.15        | 1.03        | 3.066        | 3.142        | 0.877        | 4.183        |
| 4  | $Cs_2AgSbBr_6$                                 | 11.379       | 1.88        | 1.15        | 0.76        | 2.862        | 2.827        | 0.932        | 3.959        |
| 5  | $Cs_2AgSbCl_6$                                 | 10.923       | 1.88        | 1.15        | 0.76        | 2.770        | 2.691        | 0.944        | 3.802        |
| 6  | * $Cs_2AgSbI_6$                                | 12.138       | 1.88        | 1.15        | 0.76        | 3.026        | 3.044        | 0.915        | 4.21         |
| 7  | $Cs_2AgTlBr_6$                                 | 11.980       | 1.88        | 1.15        | 0.885       | 2.926        | 3.064        | 0.912        | 3.936        |
| 8  | $Cs_2AgTlCl_6$                                 | 11.247       | 1.88        | 1.15        | 0.885       | 2.790        | 2.833        | 0.923        | 3.788        |
| 9  | $Cs_2AgTlI_6$                                  | 10.845       | 1.88        | 1.15        | 0.885       | 2.734        | 2.688        | 0.897        | 4.172        |
| 10 | $Cs_2AuBiBr_6$                                 | 11.531       | 1.88        | 1.37        | 1.03        | 2.853        | 2.911        | 0.859        | 4.123        |
| 11 | $Cs_2AuBiCl_6$                                 | 10.939       | 1.88        | 1.37        | 1.03        | 2.732        | 2.738        | 0.867        | 3.998        |
| 12 | * $Cs_2AuBiI_6$                                | 12.277       | 1.88        | 1.37        | 1.03        | 3.006        | 3.133        | 0.849        | 4.323        |
| 13 | $Cs_2AuSbBr_6$                                 | 11.352       | 1.88        | 1.37        | 0.76        | 2.837        | 2.839        | 0.898        | 3.947        |
| 14 | $Cs_2AuSbCl_6$                                 | 10.822       | 1.88        | 1.37        | 0.76        | 2.735        | 2.676        | 0.908        | 3.806        |
| 15 | $Cs_2AuSbI_6$                                  | 11.980       | 1.88        | 1.37        | 0.76        | 2.960        | 3.029        | 0.884        | 4.172        |
| 16 | $Cs_2AuTlBr_6$                                 | 11.268       | 1.88        | 1.37        | 0.885       | 2.722        | 2.912        | 0.880        | 4.000        |
| 17 | $Cs_2AuTlCl_6$                                 | 10.800       | 1.88        | 1.37        | 0.885       | 2.598        | 2.802        | 0.888        | 3.867        |
| 18 | * $Cs_2AuTlI_6$                                | 12.140       | 1.88        | 1.37        | 0.885       | 2.907        | 3.163        | 0.867        | 4.213        |
| 20 | $Cs_2CuBiCl_6$                                 | 10.770       | 1.88        | 0.77        | 1.03        | 2.692        | 2.663        | 0.963        | 3.847        |
| 21 | * $Cs_2CuBiI_6$                                | 12.128       | 1.88        | 0.77        | 1.03        | 2.871        | 3.114        | 0.931        | 4.280        |
| 22 | * $Cs_2CuSbBr_6$                               | 11.216       | 1.88        | 0.77        | 0.76        | 2.689        | 2.850        | 0.997        | 4.296        |
| 23 | $Cs_2CuSbCl_6$                                 | 10.648       | 1.88        | 0.77        | 0.76        | 2.555        | 2.699        | 1.013        | 4.099        |
| 24 | * $Cs_2CuSbI_6$                                | 12.016       | 1.88        | 0.77        | 0.76        | 2.870        | 3.060        | 0.973        | 4.609        |
| 25 | $Cs_2CuTlBr_6$                                 | 11.216       | 1.88        | 0.77        | 0.885       | 2.804        | 2.775        | 0.974        | 4.137        |
| 26 | $Cs_2CuTlCl_6$                                 | 10.638       | 1.88        | 0.77        | 0.885       | 2.659        | 2.632        | 0.989        | 3.956        |
| 27 | * $Cs_2CuTlI_6$                                | 11.910       | 1.88        | 0.77        | 0.885       | 2.623        | 2.914        | 0.953        | 4.427        |
| 19 | <b><math>Cs_2CuBiBr_6</math><br/>This Work</b> | <b>11.18</b> | <b>1.88</b> | <b>0.77</b> | <b>1.03</b> | <b>2.615</b> | <b>2.890</b> | <b>0.950</b> | <b>4.014</b> |

\* indicates the materials which do not satisfy stable perovskite criterion  $t' < 4.18$ .

**Table ST1:** The optimized lattice parameter, ionic radii of the constituent ions, bond lengths along with Goldschmidt tolerance factor ( $t$ ) and Modified tolerance factor ( $t'$ ) for  $Cs_2BB'X_6$  (B-: Ag/Au/Cu, B'-: Bi/Sb/Tl and X-: Br/Cl/I) systems.
